# Supplementary material for: Virus-like particles with FLAG-tagged envelope protein as a tetravalent dengue vaccine candidate
Source: PubMed Central journal article supplement (PMC8413300; doi:10.1038/s41598-021-97038-4), 2021-09-02

# **Virus-like particles with FLAG-tagged envelope protein as a tetravalent dengue vaccine candidate**

Toshifumi Imagawa<sup>1</sup>, Masahiko Ito<sup>1</sup>, Mami Matsuda<sup>2</sup>, Kenji Nakashima<sup>1</sup>, Yuhei Tokunaga<sup>3</sup>, Isao Ohta<sup>3</sup>, Tian-Cheng Li<sup>2</sup>, Ryosuke Suzuki<sup>2</sup>, Tetsuro Suzuki<sup>1\*</sup>

1 Department of Virology and Parasitology, Hamamatsu University School of Medicine, Hamamatsu 431-3192, Japan

2 Department of Virology II, National Institute for Infectious Disease, Musashi-murayama, Tokyo 208-0011, Japan

3 Advanced Research Facilities and Services, Preeminent Medical Photonics Education & Research Center, Hamamatsu University School of Medicine, Hamamatsu 431-3192, Japan

This file contains supplementary figure 1 to 4.

# Supplementary figure 1

Uncropped pictures of western blotting in Figure 1

Figure 1(c)

**Cell lysate**

**Supernatant**

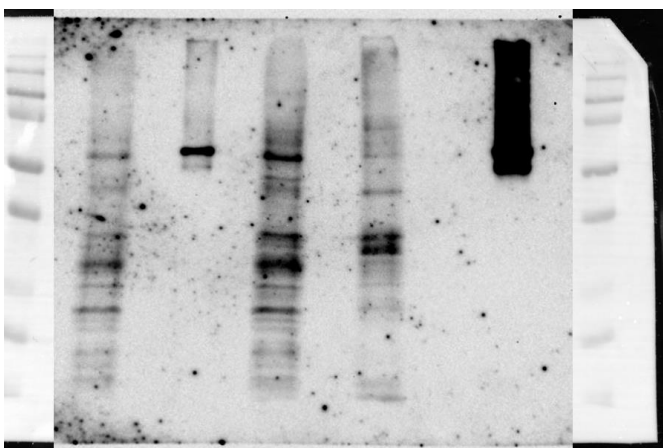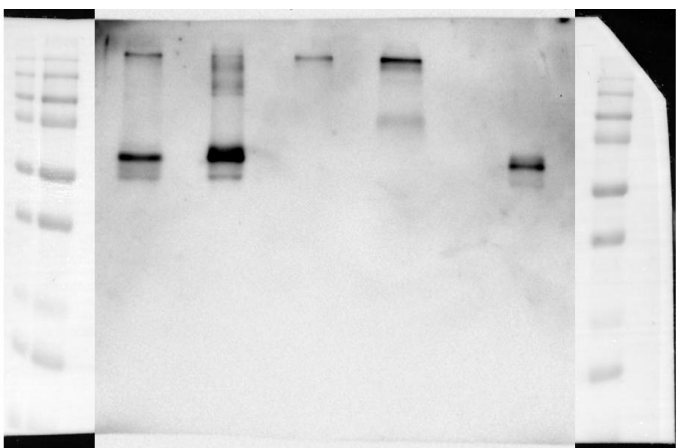

**WB:FLAG**

**WB:E protein**

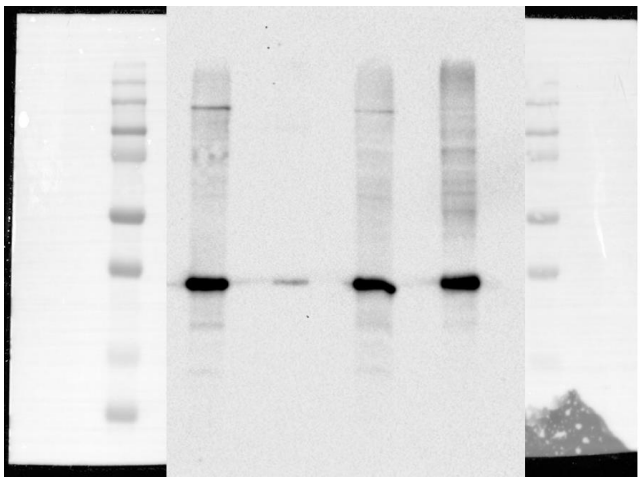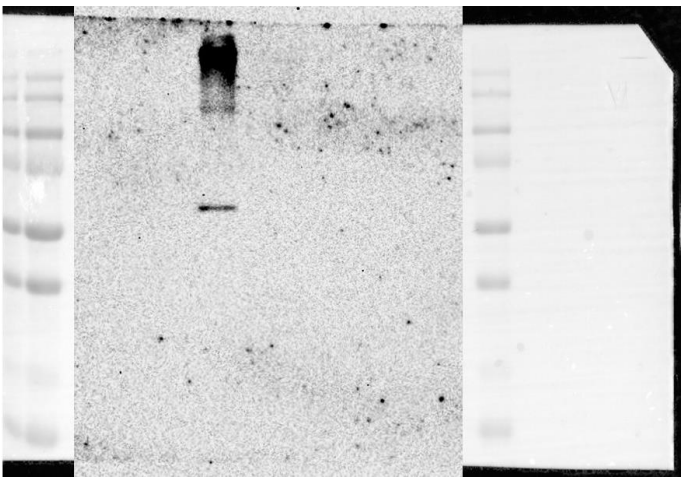

**WB: GAPDH**

**WB:FLAG**

# Supplementary figure 2

Uncropped pictures of western blotting in Figure 2

Figure 2(b)

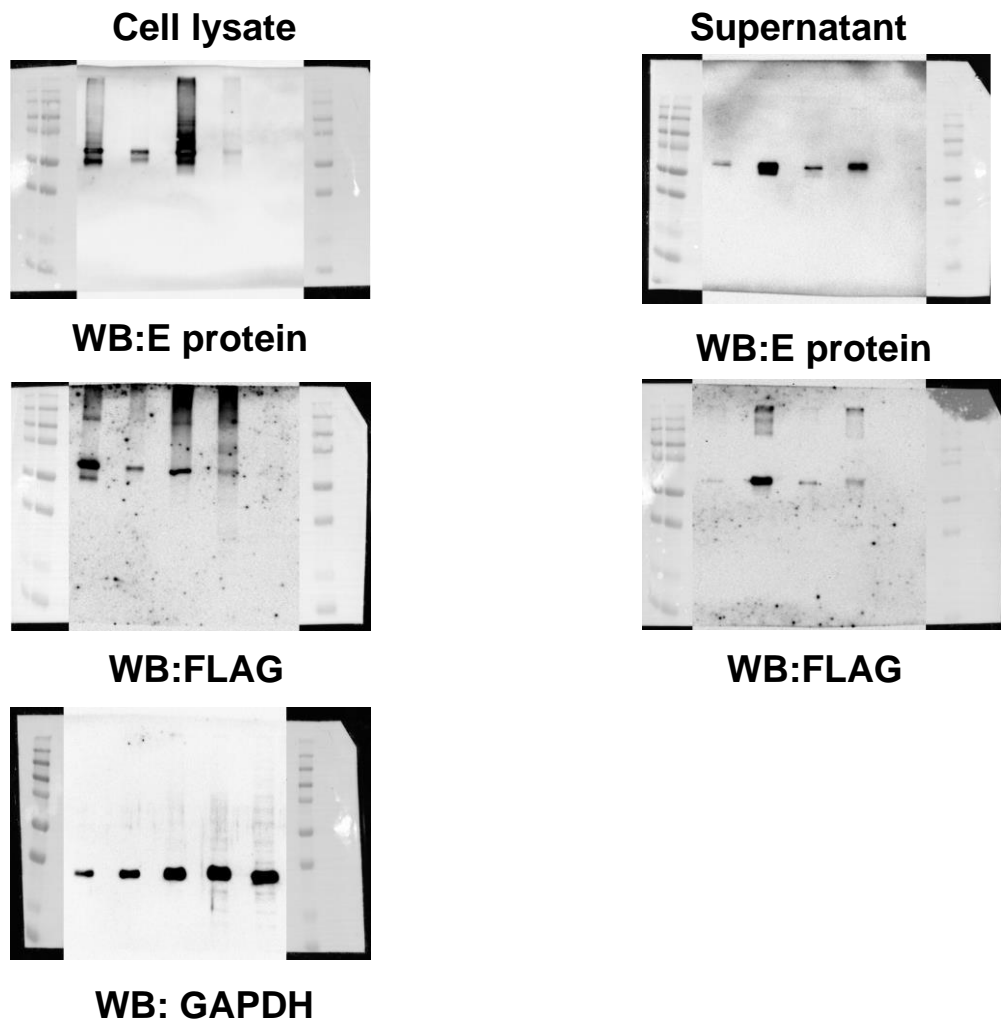

Figure 2(c)

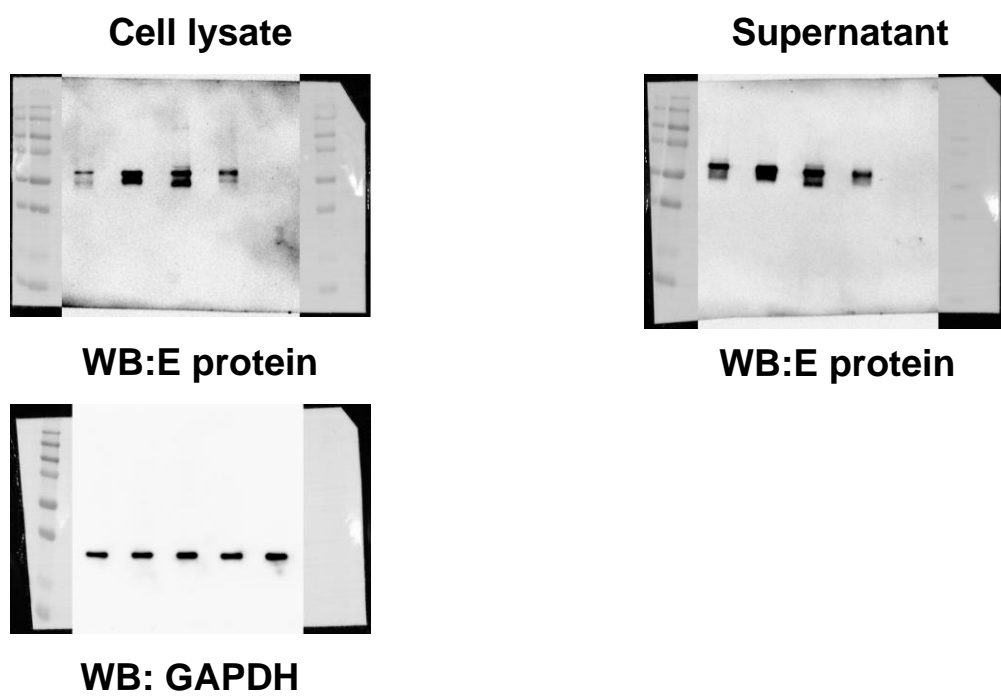

# Supplementary figure 3

Uncropped pictures of western blotting and CBB staining in Figure 3

Figure 3(a)

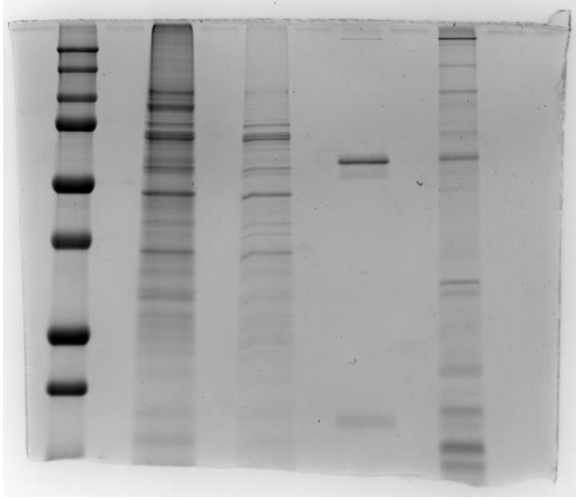

CBB staining

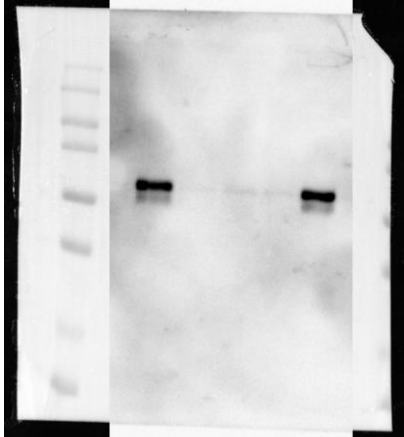

WB: E protein

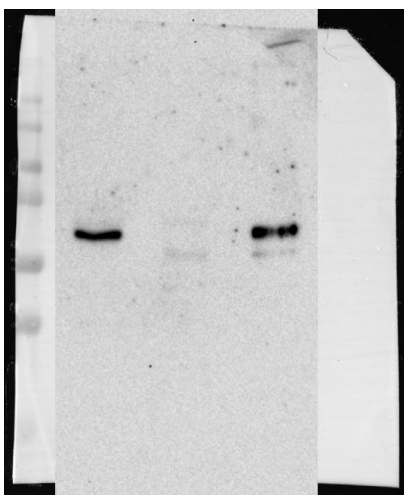

WB: FLAG

Figure 3(b)

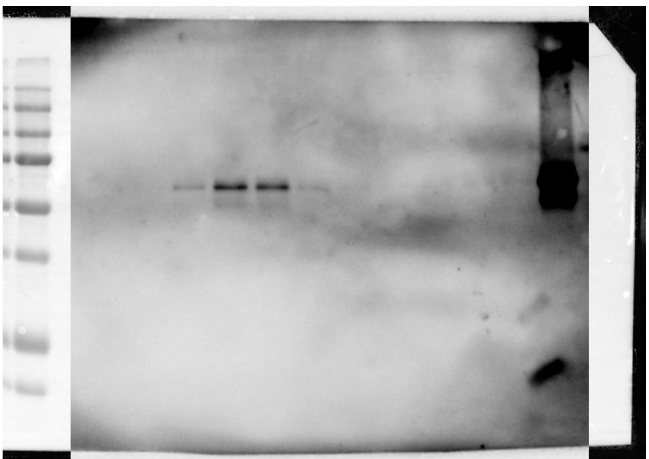

WB: E protein

Figure 3(c)

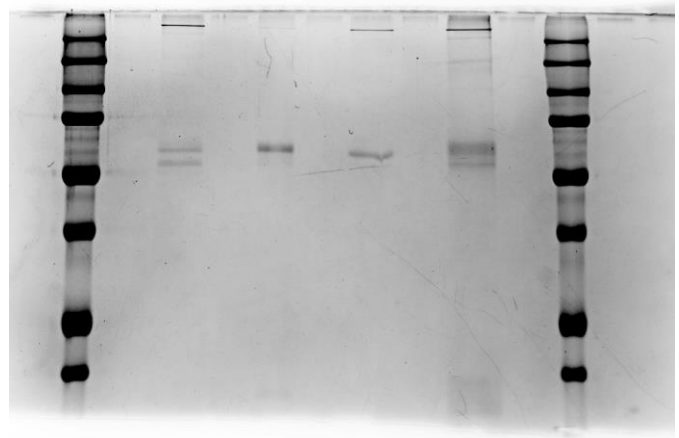

CBB staining

# Supplementary figure 4

Infectious rates of DENV SRIPs in the presence of diluted sera from each mouse (C1-C5) in non-immunized, negative control group were shown.

## DENV-1

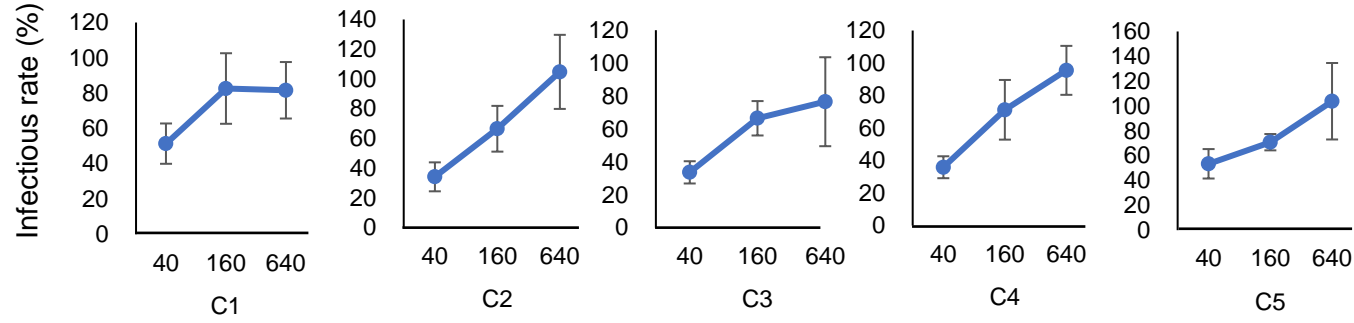

## DENV-2

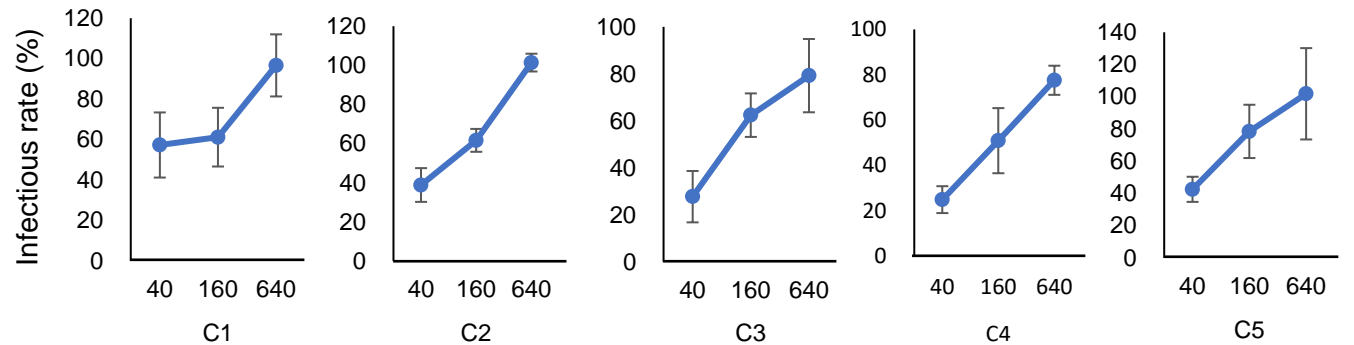

## DENV-3

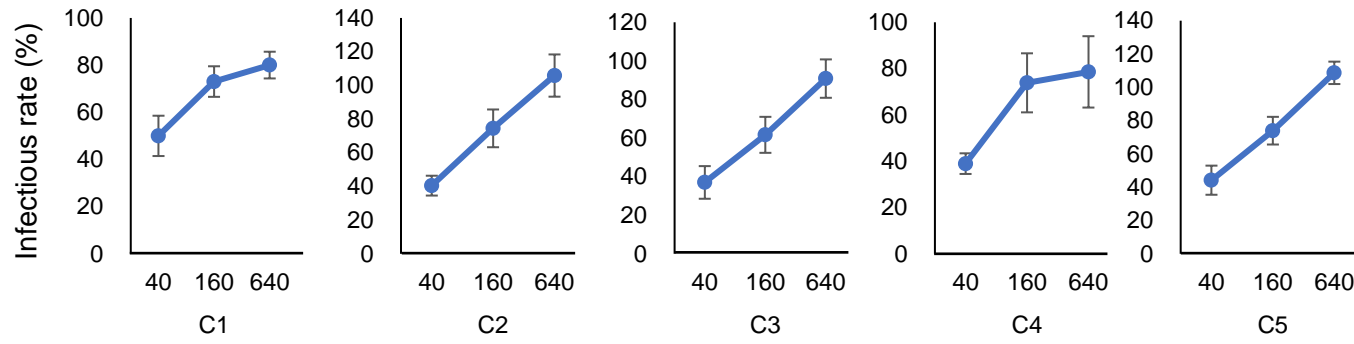

## DENV-4

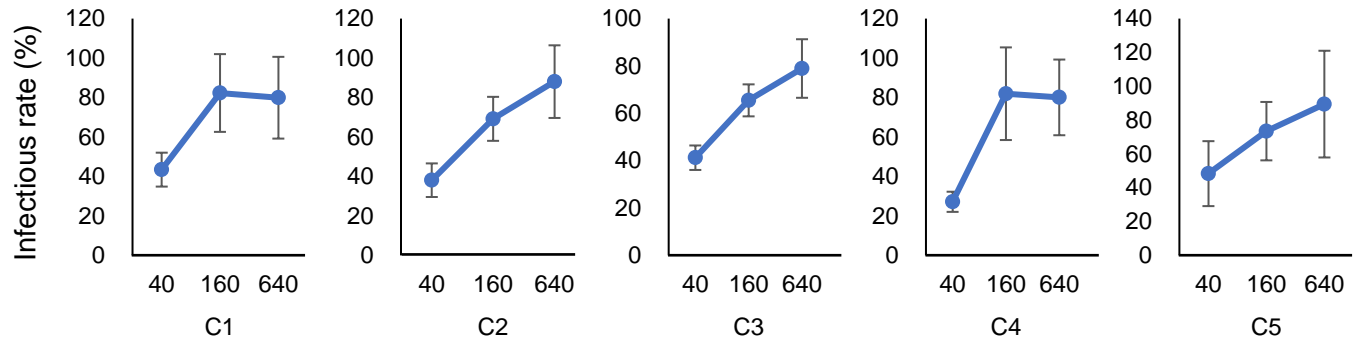

Supplement: 41598_2021_97038_MOESM1_ESM.pdf [file 41598_2021_97038_MOESM1_ESM.pdf]
